# Supplementary material
Source: MDPI journal article supplement (https://www.mdpi.com/1999-4907/12/4/427)
Supplement: s1 [file s1]

Table S1. The basic information of community structures and demographics.

| Variables              | Mean   | Min   | Max   |
|------------------------|--------|-------|-------|
| AGB <sub>11</sub> (Mg) | 7.56   | 0.80  | 40.02 |
| AGB <sub>16</sub> (Mg) | 7.95   | 0.80  | 40.48 |
| N <sub>11</sub>        | 297.87 | 68    | 651   |
| N <sub>16</sub>        | 283.24 | 5     | 639   |
| S <sub>11</sub>        | 3.015  | 2.301 | 3.517 |
| S <sub>16</sub>        | 3.080  | 2.280 | 3.540 |
| SR                     | 43.84  | 22    | 65    |
| Rao Q                  | 4.72   | 1.82  | 10.45 |
| Small trees (%)        | 53.81  | 31.25 | 70.24 |
| Large trees (%)        | 1.16   | 0     | 5.63  |
| Mortality (%)          | 10.86  | 2.22  | 30.89 |
| Recruitments (%)       | 5.82   | 0     | 36.89 |

Note: AGB<sub>16</sub> and AGB<sub>11</sub> are the AGB of living trees in each 20 m × 20 m subplot in 2016 and 2011, respectively; N<sub>11</sub> and N<sub>16</sub> are the numbers of alive trees in each subplot in 2011 and 2016 respectively, and N<sub>11</sub> is also the community density index; S<sub>11</sub> and S<sub>16</sub> are the Shannon indexes of each subplot in 2011 and 2016 respectively; SR is the number of species in each subplot in 2011; Rao Q is Rao's quadratic entropy in each subplot in 2011; Small trees and Large trees are the proportions of small and large trees in each subplot in 2011 respectively. Mortality and recruitments are the proportions of dead and new recruit individuals between 5 years respectively.

Table S2 The results of principal component analysis for functional traits.

| Functional traits   | CWM <sub>PC1</sub><br>(56.60%) | CWM <sub>PC2</sub><br>(16.72%) | CWM <sub>PC3</sub><br>(9.22%) |
|---------------------|--------------------------------|--------------------------------|-------------------------------|
| CWM <sub>LDMC</sub> | -1.41                          | -2.18                          | 0.46                          |
| CWM <sub>LT</sub>   | -2.10                          | 0.12                           | 1.34                          |
| CWM <sub>LA</sub>   | 1.86                           | -1.73                          | 0.56                          |
| CWM <sub>SLA</sub>  | 2.85                           | -0.31                          | -0.30                         |
| CWM <sub>LCC</sub>  | -1.68                          | -1.74                          | -1.38                         |
| CWM <sub>LNC</sub>  | 2.73                           | -0.58                          | -0.49                         |
| CWM <sub>LPC</sub>  | 1.93                           | -0.66                          | 1.39                          |
| CWM <sub>LCN</sub>  | -2.84                          | -0.42                          | 0.13                          |

Note: CWM<sub>LDMC</sub>, community-weighted mean of leaf dry mass content; CWM<sub>LT</sub>, community-weighted mean of leaf thickness; CWM<sub>LA</sub>, community-weighted mean of leaf area; CWM<sub>SLA</sub>, community-weighted mean of specific leaf area; CWM<sub>LCC</sub>, community-weighted mean of leaf carbon content; CWM<sub>LNC</sub>, community-weighted mean of leaf nitrogen content; CWM<sub>LPC</sub>, community-weighted mean of leaf content phosphorus; CWM<sub>LCN</sub> community-weighted mean of leaf C/N.

Table S3 The results of principal component analysis for soil nutrients.

| Soil nutrients | Soil <sub>PC1</sub><br>(33.26%) | Soil <sub>PC2</sub><br>(13.69%) | Soil <sub>PC3</sub><br>(11.65%) | Soil <sub>PC4</sub><br>(9.25%) | Soil <sub>PC5</sub><br>(8.81%) | Soil <sub>PC6</sub><br>(7.31%) |
|----------------|---------------------------------|---------------------------------|---------------------------------|--------------------------------|--------------------------------|--------------------------------|
| SNa            | 2.30                            | -0.28                           | 0.06                            | -0.67                          | 0.13                           | -0.67                          |
| SNb            | 1.83                            | 0.62                            | 1.60                            | -0.42                          | 0.49                           | 0.18                           |
| SCa            | 2.31                            | -0.76                           | -0.69                           | -0.53                          | -0.03                          | -0.18                          |
| SCb            | 2.09                            | 0.28                            | 0.95                            | -0.42                          | 0.55                           | 0.85                           |
| SPa            | 1.50                            | 0.21                            | -0.77                           | -0.11                          | -0.93                          | -0.26                          |
| SPb            | 0.62                            | 1.23                            | 0.35                            | 0.58                           | -1.17                          | 1.21                           |
| SC13a          | -1.42                           | -0.07                           | -0.21                           | -1.88                          | -0.23                          | -0.31                          |
| SC13b          | -1.60                           | -0.01                           | 0.32                            | -1.47                          | 0.46                           | 1.05                           |
| T              | -0.10                           | -0.88                           | -0.03                           | 0.84                           | 1.84                           | 0.13                           |
| PH             | -0.60                           | 1.32                            | 1.48                            | 0.02                           | 0.04                           | -1.53                          |
| CD             | 1.47                            | 1.36                            | -1.48                           | -0.41                          | 0.75                           | -0.08                          |
| BD             | -0.83                           | 2.19                            | -0.93                           | 0.10                           | 0.79                           | 0.05                           |

Note: SNa and SNb are soil total nitrogen at top and bottom soil layer, respectively; SCa and SCb are soil total carbon at top and bottom soil layer, respectively; SPa and SPb are soil total phosphorus at top and bottom soil layer, respectively; SC13a and SC13b are  $\delta^{13}\text{C}$  isotope at top and bottom soil layer, respectively; T is soil temperature; PH is soil pH; CD is soil carbon density; BD is soil bulk density

Table S4 The direct and indirect effects of predictors for  $\Delta\text{AGB}$ .

| Predictor                             | Pathway to $\Delta\text{AGB}$      | Effect  |
|---------------------------------------|------------------------------------|---------|
| Topographic variable<br>(cos(aspect)) | Direct                             | -0.06   |
|                                       | Indirect through small tree        | -0.01*  |
|                                       | Indirect through community density | 0.01    |
|                                       | Indirect through mortality         | 0.01    |
|                                       | Indirect through large tree        | 0.01    |
|                                       | Total effect                       | -0.03   |
| Small trees                           | Direct                             | -0.13** |
|                                       | Indirect through community density | 0.12**  |
|                                       | Indirect through mortality         | -0.02   |
|                                       | Total effect                       | -0.04   |
| Large trees                           | Direct                             | 0.21**  |
|                                       | Indirect through community density | -0.05** |
|                                       | Indirect through mortality         | 0.04**  |
|                                       | Total effect                       | 0.20**  |
| Community density                     | Direct                             | 0.38**  |
|                                       | Indirect through mortality         | 0.10**  |
|                                       | Total effect                       | 0.48**  |
| Mortality                             | Direct                             | -0.27** |

Note:  $p < 0.05$  (\*) and  $< 0.01$  (\*\*)

Table S5 The direct and indirect effects of predictors for CRI.

| Predictor                                       | pathway to CRI                       | effect  |
|-------------------------------------------------|--------------------------------------|---------|
| Topographic variable<br>(Convexity + Elevation) | Direct                               | 0.41**  |
|                                                 | Indirect through large tree          | 0.002   |
|                                                 | Indirect through SR                  | -0.05*  |
|                                                 | Indirect through CWM <sub>PC1</sub>  | -0.03   |
|                                                 | Indirect through Soil <sub>PC2</sub> | 0.02    |
|                                                 | Total effect                         | 0.36**  |
| Soil nutrient (Soil <sub>PC2</sub> )            | Direct                               | -0.08   |
|                                                 | Indirect through large tree          | -0.002  |
|                                                 | Indirect through SR                  | -0.01   |
|                                                 | Indirect through CWM <sub>PC1</sub>  | 0.001   |
|                                                 | Total effect                         | -0.09   |
| Large trees                                     | Direct                               | 0.09*   |
| Functional trait (CWM <sub>PC1</sub> )          | Direct                               | 0.04    |
|                                                 | Indirect through large tree          | -0.02   |
|                                                 | Total effect                         | 0.013   |
| Species richness (SR)                           | Direct                               | -0.13** |
|                                                 | Indirect through large tree          | -0.02*  |
|                                                 | Total effect                         | -0.15** |

Table S6 The direct and indirect effects of predictors for  $\Delta S$ .

| Predictor                               | pathway to $\Delta S$                | effect  |
|-----------------------------------------|--------------------------------------|---------|
| Topographic variable<br>(convexity)     | Direct                               | -0.08*  |
|                                         | Indirect through recruitment         | 0       |
|                                         | Indirect through Rao Q               | 0.03**  |
|                                         | Indirect through CWM <sub>PC1</sub>  | -0.12** |
|                                         | Indirect through Soil <sub>PC1</sub> | 0.01    |
|                                         | Total effect                         | -0.17** |
| Soil nutrient (Soil <sub>PC1</sub> )    | Direct                               | 0.08*   |
|                                         | Indirect through recruitment         | 0.02    |
|                                         | Indirect through Rao Q               | 0.02    |
|                                         | Indirect through CWM <sub>PC1</sub>  | 0.02    |
|                                         | Total effect                         | 0.09*   |
| Functional traits (CWM <sub>PC1</sub> ) | direct                               | 0.27**  |
|                                         | Indirect through Rao Q               | -0.24** |
|                                         | Total effect                         | 0.03    |
| Biodiversity (Rao Q)                    | Direct                               | -0.29** |
| Recruitment                             | Direct                               | 0.36**  |
|                                         | Indirect through Rao Q               | 0       |
|                                         | Total effect                         | 0.37**  |
